# Supplementary material
Source: Springer Nature journal article supplement (https://www.springermedizin.de/resource/supplementary/13054_2011_599_MOESM5_ESM.pdf/9708430)

### Product-Limit Survival Estimates

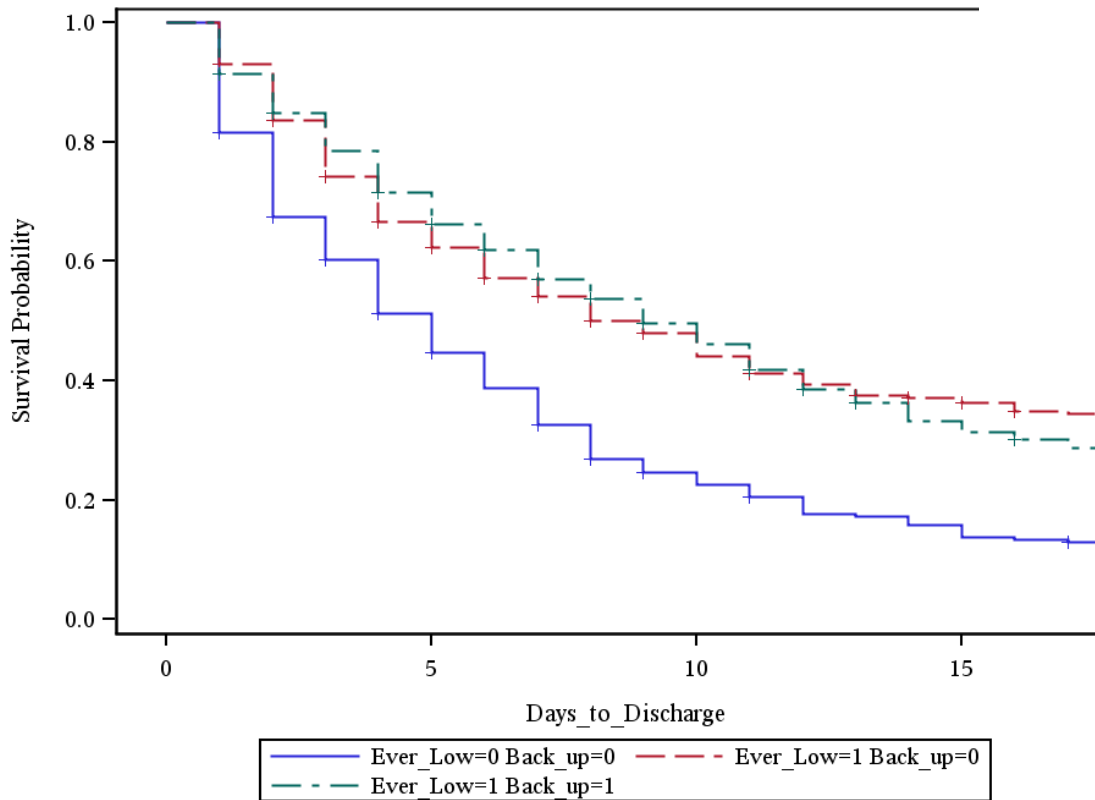

Supplement: MOESM5 [file 9708430]
